# Supplementary material for: Peptide-mediated cationic micelles drug-delivery system applied on a VEGFR3-overexpressed tumor
Source: Royal Society of Chemistry journal article supplement (doi:10.1039/c8tb02255k), 2019-01-01
Supplement: c8tb02255k1.pdf [file c8tb02255k1.pdf]

**Electronic Supplementary Information**

**Peptide-mediated Cationic Micelles Drug Delivery System**

**Applied on VEGFR3-overexpressed Tumor**

Qi Y. Wang<sup>a</sup>, Hong M. Li<sup>a</sup>, Zhi P. Dong<sup>a</sup>, Bing X. Li<sup>a</sup>, Ming Huo<sup>a</sup>, Tao Lu<sup>\*a</sup>, Yue Wang<sup>\*a</sup>

<sup>a</sup>Key Laboratory of Biomedical Functional Materials, School of Sciences, China

Pharmaceutical University, Nanjing 211198, Jiangsu Province, China.

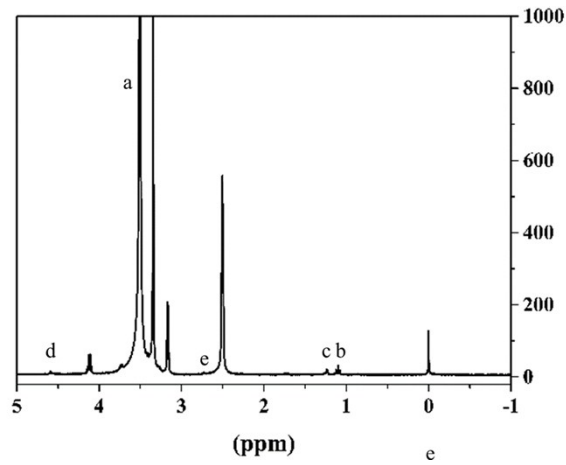

**Figure S1.**  $^1\text{H}$  NMR spectra of acetal-PEG-NH<sub>2</sub>

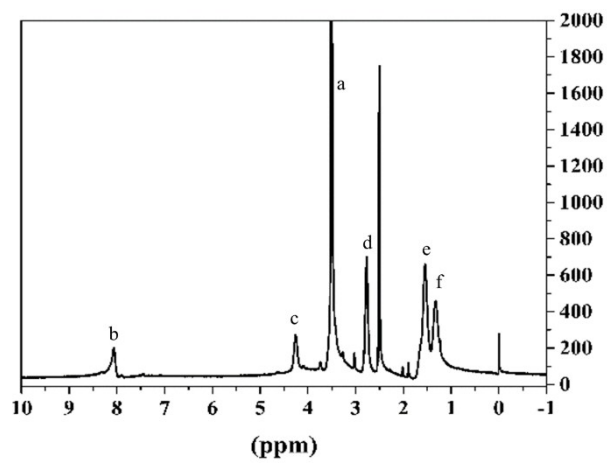

**Figure S2.**  $^1\text{H}$  NMR spectra of acetal-PEG<sub>100</sub>-b-PLL<sub>100</sub>

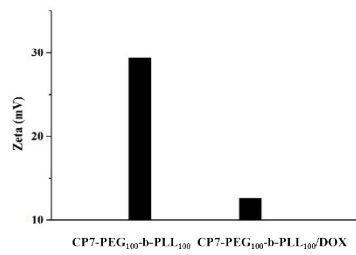

**Figure S3.** Zeta potential of CP7-PEG<sub>100</sub>-b-PLL<sub>100</sub> and CP7-PEG<sub>100</sub>-b-PLL<sub>100</sub>/DOX micelles

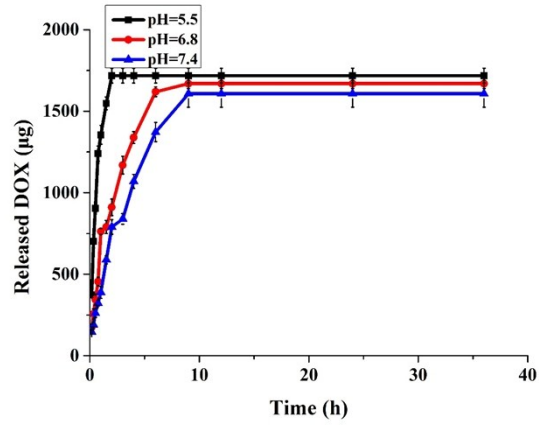

**Figure S4.** In vitro release profiles of free DOX at pH 5.5, 6.8 and 7.4

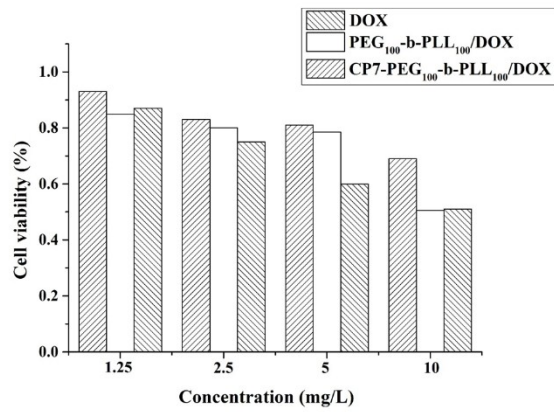

**Figure S5.** Cell viability rate of RKO cell lines after co-incubation with DOX, PEG<sub>100</sub>-b-PLL<sub>100</sub>/DOX and CP7-PEG<sub>100</sub>-b-PLL<sub>100</sub>/DOX for 72 h, respectively.
